# Supplementary material
Source: PubMed Central journal article supplement (PMC3670728)
Supplement: supp_mst040_Supplementary.pdf [file supp_mst040_Supplementary.pdf]

# Supplementary Material Quartet-Net: A Quartet Based Method to Reconstruct Phylogenetic Networks

Jialiang Yang, Stefan Grünewald and Xiu-Feng Wan

## 1 k-weakly Compatible System

A split system  $\mathcal{S}$  is *k-weakly compatible* if any  $k + 2$  splits  $A_i|B_i \in \mathcal{S}$  with  $i = 1, 2, \dots, k + 2$  are k-weakly compatible in the sense that if  $|\bigcap_{i=1}^{k+2} A_i| > k - 1$ , then at least one of the  $k + 2$  intersections  $A_i \cap \bigcup_{j \neq i, 1 \leq j \leq k+2} B_j$ ,  $i = 1, 2, \dots, k + 2$  is empty. It is clear from the definition that weakly compatible is the same as 1-weakly compatible.

**Lemma 1.** *k-1-weakly compatible split systems are also k-weakly compatible.*

*Proof.* Suppose  $\mathcal{S}$  is a  $k - 1$ -weakly compatible split system. For any  $k + 2$  splits  $A_i|B_i \in \mathcal{S}$  with  $i = 1, 2, \dots, k + 2$ , if  $|\bigcap_{i=1}^{k+2} A_i| > k - 1$ , then  $|\bigcap_{i=1}^{k+1} A_i| > k - 1 > k - 2$  since  $|\bigcap_{i=1}^{k+1} A_i| \geq |\bigcap_{i=1}^{k+2} A_i|$ . Since  $\mathcal{S}$  is  $k - 1$ -weakly compatible, at least one of the  $k + 1$  intersections  $A_i \cap \bigcup_{j \neq i, 1 \leq j \leq k+1} B_j$ ,  $i = 1, 2, \dots, k + 1$  is empty. Intersecting with  $B_{k+2}$ , one has that at least one of the  $k + 2$  intersections  $A_i \cap \bigcup_{j \neq i, 1 \leq j \leq k+2} B_j$ ,  $i = 1, 2, \dots, k + 2$  is empty. By definition,  $\mathcal{S}$  is also k-weakly compatible.  $\square$

As a proposition, any weakly compatible system is also 2-weakly compatible. It is worth noting that the split system  $\{xa|bc, xb|ac, xc|ab\}$  is 2-weakly compatible but not weakly compatible. So 2-weakly compatible is indeed a proper generalization of weakly compatible.

## 2 Proof of the equivalence between the recurrence system Eqn. (1) ~ (4) and Split Decomposition

In Split-Decomposition paper (Bandelt and Dress 1992), the split weight (isolation index) of any split  $A|B$ , denoted by  $\alpha(A|B)$ , is defined as

$$\alpha(A|B) = \frac{1}{2} \min_{a,a' \in A; b,b' \in B} \{ \max\{w(a|b) + w(a'|b'), w(a'|b) + w(a|b'), w(a|a') + w(b|b')\} - w(a|a') - w(b|b') \}.$$

To prove the equivalence of Equations (1) to (4) and Split Decomposition, we next show that the function  $\alpha$  and  $w$  are equivalent for any split  $A|B$ .

*Proof.* The objective is to show that  $\alpha(A|B) = w(A|B)$  for any split  $A|B$ . We prove it case by case on the cardinalities  $|A| = m$  and  $|B| = n$ .

(1)  $m = 1$  and  $n \geq 1$ , that is, the case  $a|A$ . By definition,

$$\begin{aligned} & \alpha(a|A) \\ &= \frac{1}{2} \min_{b,b' \in A} \{ \max\{ab + ab', aa + bb'\} - aa - bb' \} \\ &= \frac{1}{2} \min_{b,b' \in A} \{ \max\{ab + ab' - bb', 0\} \} \\ &= \max \left\{ 0, \frac{1}{2} \min_{b,b' \in A} \{ ab + ab' - bb' \} \right\} \\ &= w(a|A) \end{aligned}$$

By symmetry, The equality also holds for  $n = 1$  and  $m \geq 1$ .

(2)  $m = 2$  and  $n = 2$ , that is, the case  $aa'|bb'$ . The following lemma is presented in Bandelt and Dress (1992a).

**Lemma 2** (Bandelt and Dress, 1992a). *Let  $A_0|B_0$  be a partial split on  $X$ , then for all  $x \in X - (A_0 \cup B_0)$*

$$\alpha(A_0x|B_0) + \alpha(A_0|B_0x) \leq \alpha(A_0|B_0).$$

Setting  $A_0 = a$ ,  $x = a'$ ,  $B_0 = bb'$ , one has

$$\alpha(aa'|bb') \leq \alpha(a|bb') - \alpha(a|a'bb').$$

Incorporating with  $w(a|bb') = \alpha(a|bb')$  and  $w(a|a'bb') = \alpha(a|a'bb')$ , one has

$$\alpha(aa'|bb') \leq w(a|bb') - w(a|a'bb')$$

Similarly,

$$\alpha(aa'|bb') \leq w(a'|bb') - w(a'|abb'),$$

$$\alpha(aa'|bb') \leq w(aa'|b) - w(aa'b|b),$$

$$\alpha(aa'|bb') \leq w(aa'|b') - w(aa'b|b').$$

By definition,  $\alpha(aa'|bb') \leq w(aa'|bb')$ .

We next prove  $\alpha(aa'|bb') \geq w(aa'|bb')$ . For convenience, we let  $\beta(aa'|bb') = \frac{1}{2}(\max\{ab + a'b', a'b + ab', aa' + bb'\} - aa' - bb')$ , and denote  $\beta(aa|bb)$  and  $\beta(aa|bb')$  by  $\beta(a|b)$  and  $\beta(a|bb')$  respectively. Then, by definition

$$\begin{aligned} \alpha(aa'|bb') &= \min\{\beta(a|b), \beta(a|b'), \beta(a'|b), \beta(a'|b'), \\ &\beta(aa'|b), \beta(aa'|b'), \beta(a|bb'), \beta(a'|bb'), \beta(a|a'bb'), \beta(a'|a'bb')\}. \end{aligned}$$

If  $\alpha(aa'|bb') = \beta(a|b)$ , then  $\alpha(aa'|bb') \geq w(aa'|bb')$  since  $\beta(a|b) \geq \alpha(a|bb') \geq \alpha(a|bb') - \alpha(a|a'bb') \geq w(aa'|bb')$ . Similarly,  $\alpha(aa'|bb') \geq w(aa'|bb')$  if  $\alpha(aa'|bb')$  equals to  $\beta(a|b')$ ,  $\beta(a'|b)$ ,  $\beta(a'|b')$ ,  $\beta(a|bb')$ ,  $\beta(a'|bb')$ ,  $\beta(a, a'|b)$  or  $\beta(aa'|b')$ .

Thus, without loss of generality, we assume

$$\alpha(aa'|bb') = \beta(aa'|bb') = \frac{1}{2}(\max\{ab + a'b', a'b + ab', aa' + bb'\} - aa' - bb').$$

Noting that  $\alpha(a|a'bb') = \frac{1}{2} \min\{2aa', 2ab, 2ab', aa' + ab - a'b, aa' + ab' - a'b', ab + ab' - bb'\}$ , we divide into 3 cases.

Case 1:  $\alpha(a|a'bb') = ab$ , then  $\alpha(a|bb') = ab$ , and thus  $w(aa'|bb') \leq \alpha(a|bb') - \alpha(a|a'bb') = 0 \leq \alpha(aa'|bb')$ . Similarly, we can prove  $w(aa'|bb') \leq \alpha(aa'|bb')$  if  $\alpha(a|a'bb')$  equals to  $2ab'$  or  $ab + ab' - bb'$ .

Case 2:  $\alpha(a|a'bb') = \frac{1}{2} \min\{aa' + ab - a'b, aa' + ab' - a'b'\}$ , then

$$\begin{aligned}
& w(aa'|bb') \\
& \leq \alpha(a|bb') - \alpha(a|a'bb') \\
& = \frac{1}{2} \min\{2ab, 2ab', ab + ab' - bb'\} - \frac{1}{2} \min\{aa' + ab - a'b, aa' + ab' - a'b'\} \\
& \leq \frac{1}{2}(ab + ab' - bb') - \frac{1}{2} \min\{aa' + ab - a'b, aa' + ab' - a'b'\} \\
& = \frac{1}{2}(\max\{ab + a'b', a'b + ab'\} - aa' - bb') \\
& = \alpha(aa'|bb').
\end{aligned}$$

The last equality holds since  $w(aa'|bb') \geq 0$  by definition.

Case 3:  $\alpha(a|a'bb') = 2aa'$ . Then,  $2aa' \leq aa' + ab - a'b$ ,  $2aa' \leq aa' + ab' - a'b'$ , i.e.

$$\begin{aligned}
a'b & \leq ab - aa' \\
a'b' & \leq ab' - aa',
\end{aligned}$$

which implies

$$\begin{aligned}
a'b + a'b' - bb' & \leq ab + a'b' - aa' - bb' \\
a'b' + a'b - bb' & \leq ab' + a'b - aa' - bb'.
\end{aligned}$$

That is,  $\beta(a'|bb') \leq \beta(aa'|bb')$ . Thus,  $\alpha(aa'|bb') \neq \beta(aa'|bb')$ , but we have prove that  $w(aa'|bb') \leq \alpha(aa'|bb')$  in this case.

In summary,  $w(aa'|bb') = \alpha(aa'|bb')$  for  $m = 2$  and  $n = 2$ .

- (3) For  $m \geq 2$  and  $n \geq 2$ , since both methods take the minimum of  $w(a, a'|b, b')$  where  $a, a' \in A$  and  $b, b' \in B$ , by induction, the weights calculated are the same.

□

### 3 Consistency of Quartet-Net

We assume that the quartet and triplet weights that are used as the input for Quartet-Net are induced by a weighted 2-weakly compatible split system.

More precisely, let  $\mathcal{S}$  be a split system and let  $w$  be a weight function that associates a positive weight  $w(S)$  to every full split  $S$  in  $\mathcal{S}$ . Then the induced weight  $w(A'|B')$  of a (partial) split  $A'|B'$  is defined by

$$w(A'|B') = \sum_{A|B \in \mathcal{S}: A|B \text{ displays } A'|B'} w(A|B).$$

In this section we will prove that Quartet-Net, run with the triplet and quartet weights induced by a 2-weakly compatible split system  $\mathcal{S}$  with weight function  $w$  as its input, will output precisely all splits  $A|B$  in  $\mathcal{S}$  with weight  $w(A|B)$ . Note that this notion of induced weights for partial splits and consistency directly corresponds to the distance induced by a weighted split system and the consistency of a distance-based method.

We need the following property of 2-weakly compatible split systems.

**Lemma 3.** *Let  $\mathcal{S}$  be a 2-weakly compatible split system and let  $A|B$  be a non-trivial full split in  $\mathcal{S}$ . Then there is a non-trivial partial split  $A'|B'$  with  $|A'|, |B'| \leq 3$  such that  $A'|B'$  is displayed by  $A|B$  and by no other full split in  $\mathcal{S}$ .*

*Proof.* Let  $A'|B'$  be a maximal non-trivial split such that  $A'|B'$  is displayed by  $A|B$  and by no other full split in  $\mathcal{S}$ . Maximal means that every partial split that is displayed by  $A'|B'$  but not equal to  $A'|B'$  is displayed by at least two different split in  $\mathcal{S}$ . Such a split exists because  $A|B$  is displayed by itself and by no other full split in  $\mathcal{S}$ .

Assume that  $A'$  or  $B'$ , say  $B'$ , has at least four different elements  $b_1, b_2, b_3, b_4$  and let  $a_1, a_2$  be different elements of  $A'$ . Then, for  $i = 1, \dots, 4$ , there is a split  $A_i|B_i$  in  $\mathcal{S}$  such that  $A_i|B_i$  is not equal to  $A|B$  and displays  $A'|B' - b_i$ . Since  $A|B$  is the only split in  $\mathcal{S}$  that displays  $A'|B'$ , the split  $A_i|B_i$  must display  $A_i + b_i|B - b_i$ . But then the four splits  $A_i|B_i$  for  $i = 1, \dots, 4$  can not be 2-weakly compatible, a contradiction.  $\square$

We define  $A|B$  to be an  $(i, j)$ -split if  $|A| = i$  and  $|B| = j$ , or  $|A| = j$  and  $|B| = i$ , and to be a 2-split if  $|A| = 2$  or  $|B| = 2$ .

**Proposition 1.** *Let  $\mathcal{S}$  be a 2-weakly compatible split system and let  $A|B$  be a non-trivial 2-split in  $\mathcal{S}$ . Then there is a quartet or  $(2, 3)$ -split  $A'|B'$  such that  $A'|B'$  is displayed by a full split  $A|B$  and by no other full split in  $\mathcal{S}$ .*

*Proof.* By Lemma 3, there is a non-trivial partial split  $A'|B'$  that is displayed by  $A|B$  and by no other full split in  $\mathcal{S}$ . Since  $A'|B'$  is non-trivial,  $|A'| \geq 2$  and  $|B'| \geq 2$ . In addition,  $A|B$  is a 2-split and  $A'|B'$  is displayed by  $A|B$ , which forces  $A'|B'$  to be a 2-split, say  $|A'| = 2$ . By Lemma 3,  $|B'| \leq 3$ . Thus,  $A'|B'$  is a quartet or (2, 3)-split.  $\square$

The following lemma follows directly from the definition of the induced weight for partial splits.

**Lemma 4.** *Given a split system  $\mathcal{S}$  with weight function  $w$ , let  $A'|B'$  be a partial split that is displayed by a full split  $A|B \in \mathcal{S}$  and by no other full split in  $\mathcal{S}$ , then  $w(A'|B') = w(A|B)$ .*

**Theorem 1.** *If the Quartet-Net algorithm is applied to triplet and quartet weights that are induced by a weighted 2-weakly compatible split system  $\mathcal{S}$  on  $X$ , then it will output the splits in  $\mathcal{S}$  with correct weights.*

*Proof of Theorem 1.* In view of the identities that were used to define the weights that Quartet-Net assigns to the (2, 3)-splits, their weights are computed correctly. Note that the equality

$$w(aa'|bb'b'') = \frac{1}{2}(w(aa'|bb') - w(bb'|b''a) + w(b''a|a'b) - w(a'b|b'b'') + w(b'b''|aa'))$$

always holds (even after permuting  $a, a'$  resp.  $b, b', b''$ ) since the quartet weights are induced by a weighted split system on  $\{a, a', b, b', b''\}$ . Hence, taking the minimum or the average of these six identical numbers does not effect the consistency of the algorithm. Further, Proposition 1 implies that for every 2-split  $A|B$  in  $\mathcal{S}$  there is a quartet or (2, 3)-split that is displayed by  $A|B$  and no other full split in  $\mathcal{S}$ , thus the weights of all 2-splits are computed correctly. Applying the same argument to subsets of  $X$  with six elements, we have that the weights of all (2, 4)-splits are computed correctly as well. Since for every (3, 3)-split  $A|B$  with  $a \in A$  the weight of  $A|B$  equals the weight of  $A - a|B$  minus the weight of  $A - a|B + a$ , the weights of all (3, 3)-splits are computed correctly. We have proved that the weights of all non-trivial  $(i, j)$ -split with  $i \leq 3$  and  $j \leq 3$  are computed correctly. Lemma 3 implies that for every split  $A|B$  in  $\mathcal{S}$  with  $|A|, |B| \geq 3$  there is an  $(i, j)$ -split with  $i \leq 3$  and  $j \leq 3$  that is displayed by  $A|B$  and no other full split in  $\mathcal{S}$ , thus the weight of every such split is also computed correctly. Finally, the weight of every trivial split  $x|X - x$  equals the weight of the triplet  $x|yz$  minus the

sum of the weights of all non-trivial splits in  $\mathcal{S}$  that display  $x|yz$  for every pair  $\{y, z\} \subset X - x$ . Hence, the weights of all trivial splits are computed correctly.  $\square$

## References

- [1] Bandelt HJ, Dress AWM. 1992. A canonical decomposition theory for metrics on a finite set. *Advances in mathematics*. 92: 47-105.
